# Supplementary material
Source: publisher figshare collection journal article supplement (https://acs.figshare.com/ndownloader/files/13806131)
Supplement: Supplementary file 1 [file 13806131]

## Supporting Information

### **Multifunctional Lithium-Ion Exchanged Zeolite Coated Separator for Lithium-Ion Batteries**

Jiagang Xu,<sup>†</sup> Xingcheng Xiao,<sup>‡,\*</sup> Sherman Zeng<sup>§</sup>, Mei Cai,<sup>‡</sup> Mark W. Verbrugge<sup>‡</sup>

<sup>†</sup>Optimal, Inc., 47802 West Anchor Court, Plymouth, Michigan 48170, United States

<sup>‡</sup>Chemical and Materials Systems Lab, General Motors Research and Development, Warren, Michigan 48092, USA

\*E-mail: xingcheng.xiao@gm.com

<sup>§</sup>Battery Cell Engineering, General Motors Global Propulsion Systems, Warren, Michigan 48092, USA

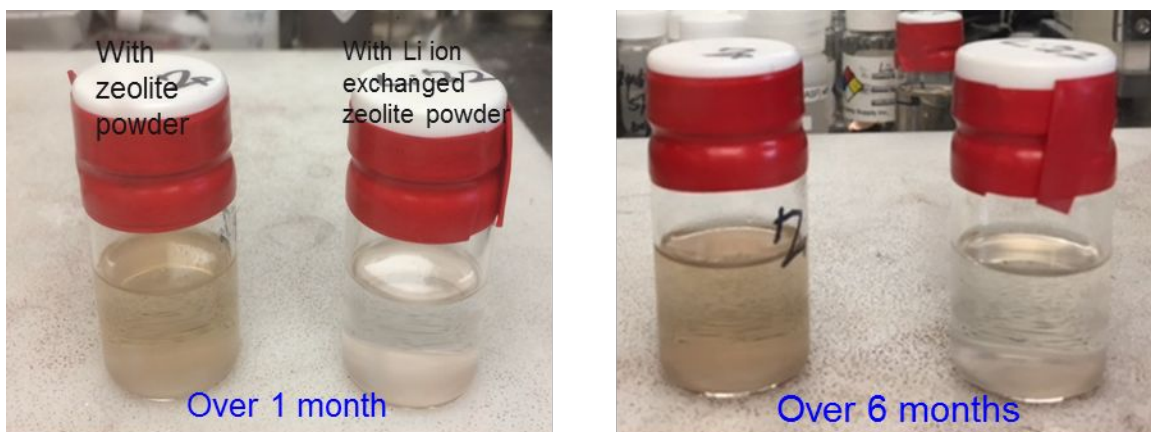

**Figure S1.** Comparison of the electrolytes mixed with the typical zeolite without ion exchange and Li-zeolite stored in glass vials after 1 month (left) and 6 months (right).

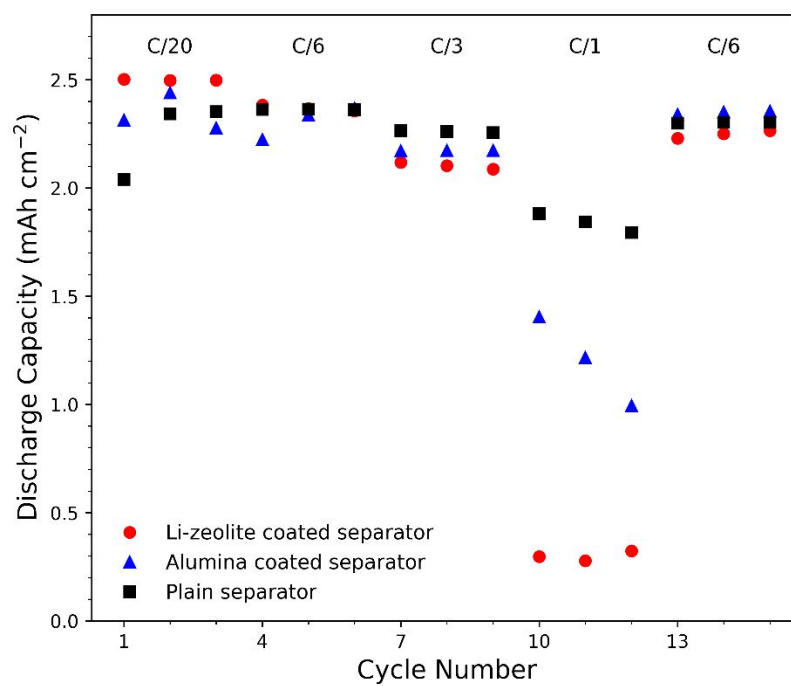

**Figure S2.** C-rate performance of graphite-(NMC532+LMO) cells containing different separators at 25 °C.

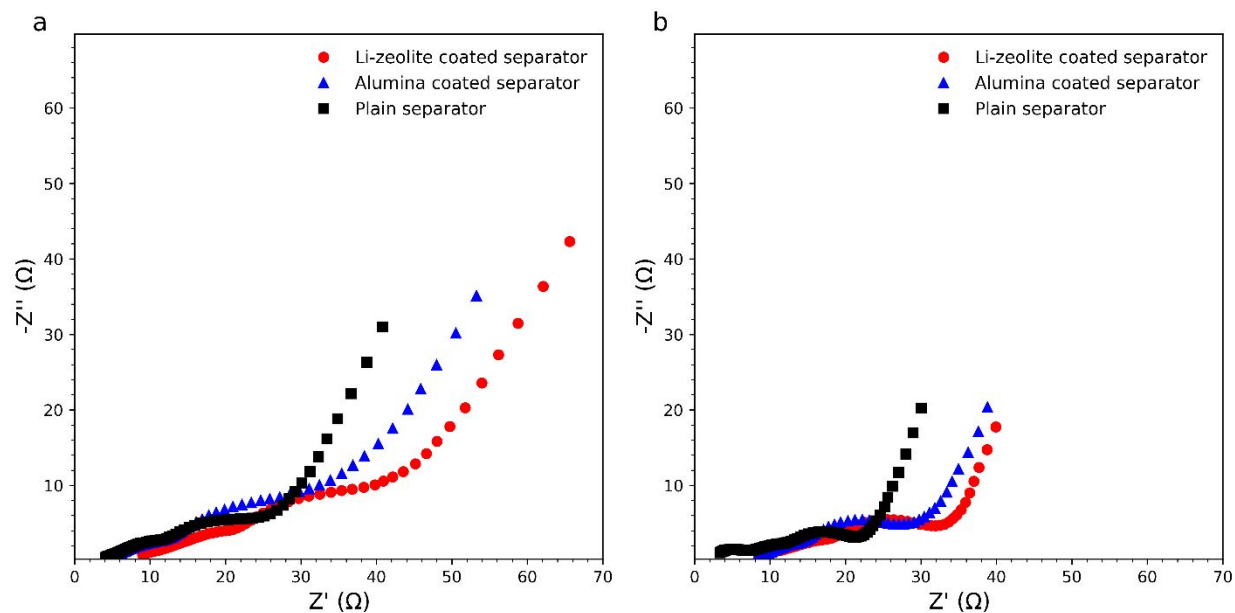

**Figure S3.** Room temperature electrochemical impedance spectra of graphite-(NMC532+LMO) cells containing different separators obtained after formation cycling (a) and at the end of the C-rate test (b).
